# Supplementary material for: Towards low-cost and high-performance air pollution measurementsusing machine learning calibration techniques
Source: Copernicus journal article supplement (doi:10.5194/amt-2020-473), 2020-12-22
Supplement: Supplementary file [file amt-2020-473-AC3-supplement.pdf]

**Dr Peer Nowack**

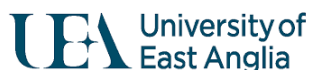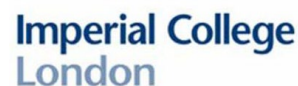

**University Lecturer**  
Atmospheric Chemistry and Data Science  
Climatic Research Unit  
School of Environmental Sciences  
University of East Anglia  
Norwich, NR4 7TJ  
United Kingdom  
p.nowack@uea.ac.uk

**Imperial College Research Fellow**  
Grantham Institute  
Department of Physics  
Data Science Institute  
Imperial College London  
London, SW7 2AZ  
United Kingdom  
p.nowack@imperial.ac.uk

24<sup>th</sup> June 2021

## **Atmospheric Measurement Techniques Manuscript amt-2020-473**

### **Reply to Reviewer #2:**

**We thank the anonymous reviewer for the overall positive feedback and helpful comments, which have helped to further improve our manuscript. We address each comment (*re-stated in italic font*) point-by-point below.**

*This study investigates a promising calibration method for the low-cost air pollution sensors, through co-location with public measurement stations and regression towards the station reference data. Four machine learning algorithms for the regression, namely Ridge, Random Forest (RF), Gaussian Process Regression (GPR) and Multiple Linear Regression (MLR) are implemented and compared. The influence from co-location training conditions and choice of calibration input data, and the issues of “site-transferability” are also discussed. Overall, this interesting manuscript is well written, and potentially contributes to the scientific community and also the environmental protection agencies.*

*My comments are listed below:*

*1. My biggest concern is about the “site-transferability”.*

*1) Any more insights on the key factors limiting the site-transferability? Description between Line 102-110 has stated that the PMS5003T series PM particle sensors are based on laser scattering using Mie theory, and the composition-wise similar environments are assumed for measurement and calibration, which potentially limits the site-transferability. If the authors could also explain the measurement principles for other sensors and how would they potentially limit the site-transferability?*

**Thank you for this important comment. We agree that there are a number of potential reasons for why site transferability can be limited. In our manuscript we aim to highlight the importance of the choice of machine learning calibration functions and aspects such as the training range of values sampled over, the number of training samples, and if the regression algorithm is linear or not. We reflect this more clearly in our revised manuscript, in particular through the change in manuscript title in response to the Reviewer #1.**

**In terms of the measurement principle, we think that the sensors are widely used and we have not produced the sensors ourselves and have not got the data to compare how different measurement principles could have affected our results. Any discussion would thus be highly speculative and could not be of quantitative nature, and is thus beyond the scope of our manuscript in our opinion. However, we agree that the fact that measurement principles could also affect transferability outcomes is worth highlighting. We have therefore added a comment**

to the discussion and conclusions (lines 533-544) on potential other factors that could also affect site transferability:

“One possible reason is a calibration blind spot, i.e. we encounter a new type of sensor interference which we did not find in the training data. For example, this could be substantial changes in environmental conditions, or e.g. PM particle composition, which are not captured by the calibration function. In our interpretation of results, this would represent again an extrapolation with respect to the predictors and/or the predictands. [...] Interesting aspects to explore as part of future work might be to compare how sensitive site transfer performances are to the measurement principle of the NO<sub>2</sub> and PM<sub>10</sub> devices used, and effects of the seasonal cycle (e.g. winter-based calibrations to be used during summer). We hope that future measurement campaigns can provide further insights into such calibration challenges, and hope that our study can motivate further work in this direction.”

In addition, we had already mentioned studies that studied such factors in the introduction where we note that (lines 62-68):

“Some significant performance losses after site transfers have been reported (Fang and Bate, 2017; Casey and Hannigan, 2018; Hagler et al., 2018; Vikram et al., 2019), with reasons typically not being straightforward to assign. A key driver might be that often devices are calibrated in an environment not representative of situations found in later measurement locations. As we discuss in greater detail below, for machine learning-based calibrations this behaviour can, to a degree, be fairly intuitively explained by the fact that they do not tend to perform well when extrapolating beyond their training domain. As we will show, this issue can easily occur in situations where already calibrated sensors have to measure pollution levels well beyond the range of values encountered in their training environment.”

*2) The use of multi-sensor nodes is a very good idea to involve more factors for the regression and thus potentially enhance the “site-transferability”. But the description for the set-up of sensor hardware in Sect. 2 is not clear. In Line 99, “Each multi-sensor node contained”, does it mean that all nodes listed in Table 1 have the same set-up of sensor hardware? If so, why the same set-up is used for NO<sub>2</sub> and PM<sub>10</sub>, respectively? In Table 1, different nodes spanning over different measurement time? Why so many nodes are used at CR7 site for the relatively shorter time period? Please add clarification.*

Yes, we indeed used the same set-up for each sensor node and each node contained measurements for NO<sub>2</sub>, various particle sizes etc. This was mainly motivated by how we operate such sensors in real world settings where we usually want to measure as many pollutants as possible simultaneously. Of course, there will be variance in the production of sensors of the same make, so that the sensor nodes are not expected to behave identically.

The different measurement periods were caused by random sensor-drop outs, sensor availability (e.g. delayed delivery, used elsewhere). We simply tried to use many sensors as possible at any given time during the period in which the sensors were run. In conclusion, these choices were all motivated by rather practical boundary conditions which we did not have full control over.

To clarify these points, we have adapted the text to the following (line 102):

“Each multi-sensor node contained (i.e. all nodes consist of the same types of individual sensors):”

We have further added the following explanation to the beginning of section 2.1 (page 4) on sensor hardware:

**“Each node thus allows for simultaneous measurement of multiple air pollutants, but we will focus on individual calibrations for NO<sub>2</sub> and PM<sub>10</sub> here because these species were of particular interest to our own measurement campaigns. We note that other species such as PM<sub>2.5</sub> are also included in the measured set of variables. We will make our low-cost sensor data available (see Data Availability statement), which will allow other users to test similar calibration procedures for other variables of interest (e.g. PM<sub>2.5</sub>, ozone). A caveat is that appropriate co-location data from higher cost reference measurements might not always be available.”**

**In addition, we have clarified in the caption of Table 1 (page 6):**

**“Overview of the measurement sites and the corresponding maximum co-location periods, which vary for each specific sensor node and co-location site due to practical aspects such as sensor availability and random occurrences of sensor failures.**

*3) In Figs. 7-8, the results for “site-transferability” looks promising except NO<sub>2</sub> concentrations predicted at CR9 between ~700-1000 h are largely underestimated. What if the node-19 is calibrated at CR9, would the peak concentrations between ~700-1000 h be properly predicted? Why the calibration is not performed at the site with a larger range for the observed concentrations (e.g., CR9 rather than CR7 for NO<sub>2</sub> for the Sect. 3.1)? I mean, the calibration at CR7 discussed at Sect. 3.1 seems to have a limited applicability.*

**The idea behind these figures is to demonstrate limitations of site transferability (i.e. to train on data measured at one site and to predict on the other), especially to highlight extrapolation issues if the two sites have very different pollution ranges. Predictions of the kind Reviewer #2 suggests here – i.e. at the same site - generally perform well, especially if the training range contains the test range of pollution values, see e.g. R<sup>2</sup>-scores in Table 2. Therefore, if node 19 was calibrated at CR9 it would be possible to predict the peak concentrations between 700-1000h better. However, this would only be the case if at least one or two of the peaks would also be contained in the training dataset as otherwise e.g. RFR would not be able to extrapolate to such high values.**

*2. Besides the spatial variability, the temporal variability is also very important. I mean, given the fixed co-location, if the calibration performed during the winter time, is applicable to make proper predictions during the summer time? Furthermore, any special treatment for the calibration of the sensor signals during occasional condition (e.g., intensive washout during the heavy rain, dust event, or strong temperature inversion, etc.) when the observed concentrations at the reference site are extraordinarily high or low?*

**Changing background conditions would in our interpretation of the results represent an extrapolation task, because the new conditions would not have been contained in the training data. Each co-location measurement campaign thus has to be aware of the potential implications of training on non-representative training conditions, which is indeed a key point we are trying to make in our paper. Given our measurement periods (Table 1), we sample some degree of seasonal variability but, of course, such tests could be extended. We have thus highlighted this point in the revised conclusions and discussion section of our manuscript (lines 533-537):**

**“One possible reason is a calibration blind spot, i.e. we encounter a new type of sensor interference which we did not find in the training data. For example, this could be substantial changes in environmental conditions, or e.g. PM particle composition, which are not captured by the calibration function. In our interpretation of results, this would represent again an extrapolation with respect to the predictors and/or the predictands.”**

In the same paragraph, we now mention that the seasonal cycle could be interesting to study, too:

**“Interesting aspects to explore as part of future work might be to compare how sensitive site transfer performances are to the measurement principle of the NO<sub>2</sub> and PM10 devices used, and effects of the seasonal cycle (e.g. winter-based calibrations to be used during summer).”**

*3. In Table 2, it is very interesting that the performance is greatly enhanced if the sensor signals relevant with NO/O<sub>3</sub> are involved into regression (i.e., (g) v.s. (f)), and further involvement of more factors does not seem to improve the performance significantly. Any more detailed explanation (the description between Line 375-378 lacks of insights)? How about the performance for the NO/O<sub>3</sub>/T/RH, if it is better than A43F/T/RH and B43F/T/RH? And the computing cost for each selection of predictors?*

**It is intuitive and well-known that NO<sub>2</sub> sensors can suffer from interference with NO/ozone. It seems that this is supported by our results and this is the point we discuss here. Using a set-up without any NO<sub>2</sub> sensors but only NO/ozone sensors would not make a lot of sense to us, especially in terms of robustness, given that we ultimately want to measure NO<sub>2</sub>. The computing cost of selecting additional predictors is in our opinion negligible (orders of a few seconds to minutes at most on a typical laptop nowadays). The discussion on possible choices concerning NO<sub>2</sub> sensor selection is motivated by the actual cost of purchasing additional devices, i.e. how much the inclusion of additional sensor signals actually helps in improving sensor performances and which degree of measurement accuracy could be reached with a reduced set-up.**

*4. It would be very nice if the authors could use a table to summarize and compare the key assumptions, algorithms, advantages/disadvantages, computing cost etc. for the four regression methods.*

**This is indeed a very good idea – thank you for the suggestion. We now include a fourth table in the manuscript, discussed in the conclusions section (page 25), which summarizes a few key points. For compactness, we have left out the computing cost because all calculations can fairly easily be carried out on standard computing systems/laptops nowadays and we believe that the focus should thus be on actual calibration performances.**

*5. In Fig. 5, how the circles (for each individual node) are calculated, as each node has a different time span? Table 2 and Fig. 4 are based on the average of the 21 nodes, right? Please add clarification*

**These are test set R<sup>2</sup>-scores (220 hours for each node) for each individual node and the numbers in Table 2 and Figure 4 are indeed average values. We discuss the split of training and test data in section 3.1:**

**“To train and cross-validate our calibration models, we took the first 820 hours measured by each sensor set and split it into 600 hours for training and cross-validation, leaving 220 hours to measure the final skill on an out-of-sample test set. We highlight again that the test set will cover different time intervals for different sensors, meaning that further randomness is introduced in how we measure calibration skill. However, the relationships for each of the four calibration methods are learned from exactly the same data, and their predictions are also evaluated on the same data, meaning that their robustness and performance can still be directly compared. To measure calibration skill we used two standard metrics in the form of the R<sup>2</sup>-score (coefficient of determination) and the RMSE between the reference measurements and our calibrated signals on the test sets. For particularly poor calibration functions, the R<sup>2</sup>-score can take on infinitely negative values whereas a value of 1 implies a perfect prediction. An R<sup>2</sup>-score of 0 is equivalent to a function that predicts the correct long-term time average of the data, but no fluctuations therein.”**

**We have added a short clarification to the caption of Figure 5 as well:**

**“Node-specific  $I_{30}$   $R^2$ -scores depending on calibration method and training sample size, evaluated on consistent 220-hour test datasets in each case (see main text).”**

**We have further added the following clarifying sentence to the captions of Table 2 and Figure 4:**

**“Results are averaged over the 21 low-cost sensor nodes with 600 hourly training samples each, and the evaluation is carried out for 220 test samples each.”**

*6. Why PM10 rather than PM2.5 is focused on? PM2.5 is more relevant with the public health issues.*

**Arguably PM2.5 is a very important metric, but both PM10 and PM2.5 are frequently used in policy and scientific domains. We chose PM10 here for project-specific reasons (our collaborators were specifically interested in PM10), but we will make our PM2.5 data public so that other researchers could investigate PM2.5, too, which is beyond the scope of our own study. We have added an explanation to our revised manuscript (see also reply to another comment above):**

**“We note that other species such as PM2.5 are also included in the measured set of variables. We will make our low-cost sensor data available (see Data Availability statement), which will allow other users to test similar calibration procedures for other variables of interest (e.g. PM2.5, ozone). However, we note that appropriate co-location data from higher cost reference measurements might not always be available.”**
